# Supplementary material for: Exposed (002) facets and controllable thickness of CdS nanobelts drive desirable hydrogen-adsorption free energy (ΔGH) for boosting visible-light photocatalytic performance
Source: Royal Society of Chemistry journal article supplement (doi:10.1039/d1cy01385h), 2021-01-01
Supplement: d1cy01385h1.pdf [file d1cy01385h1.pdf]

# Supporting Information

## **(002) facets exposed and controllable thickness of CdS nanobelts drive desirable hydrogen-adsorption free energy ( $\Delta G_H$ ) for boosting visible-light photocatalytic performance**

Dejian Yan<sup>a, b</sup>, Zhiyong Xue<sup>a\*</sup>, Feng Chen<sup>b, c</sup>, Xia Liu<sup>d</sup>, Zhenhua Yang<sup>e</sup>, Yong Pei<sup>d</sup>,  
Shaoxiong Zhou<sup>a</sup>, Caixian Zhao<sup>b,\*</sup>

<sup>a</sup> *Institute for Advanced Materials, North China Electric Power University, Beijing 10000, P.R. China*

<sup>b</sup> *School of Chemical Engineering, Xiangtan University, Xiangtan 411105, P.R. China*

<sup>c</sup> *College of Chemical Engineering, Guangdong University of Petrochemical Technology, Maoming 525000, China*

<sup>d</sup> *Key Laboratory of Environmentally Friendly Chemistry and Applications of Ministry of Education, School of Chemistry, Xiangtan University, Xiangtan 411105, China*

<sup>e</sup> *Key Laboratory of Low Dimensional Materials & Application Technology (Ministry of Education), School of Materials Science and Engineering, Xiangtan University, Xiangtan 411105, Hunan, China*

\*Corresponding author.

*E-mail address:* xuezy@ncepu.edu.cn (Z. Xue), zcx@xtu.edu.cn (C. Zhao)

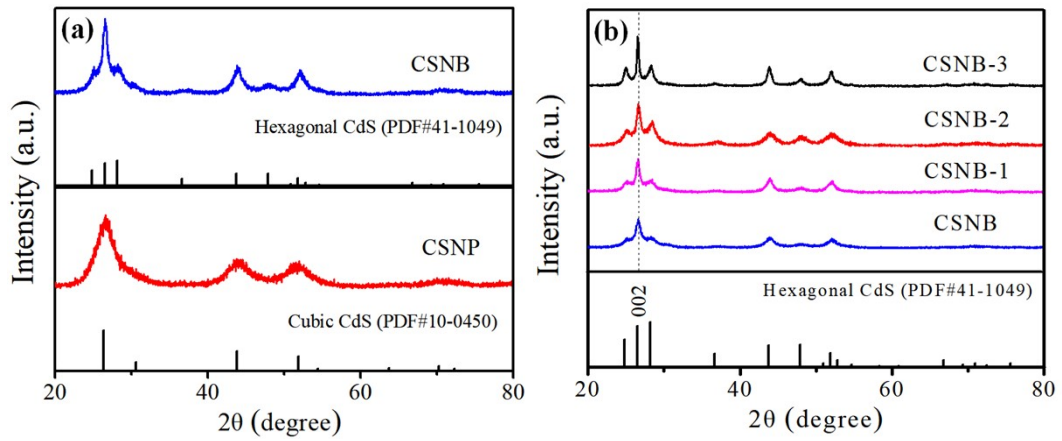

Figure S1. XRD patterns of the CdS nanobelt synthesized with different hydrothermal reaction temperature.

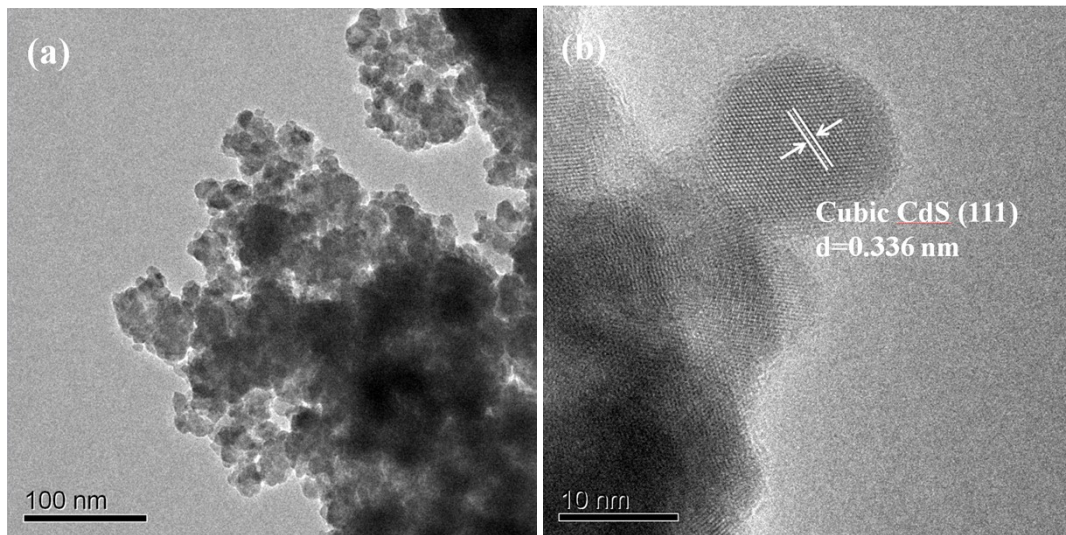

Figure S2. TEM and HRTEM image of the as-synthesized CSNP.

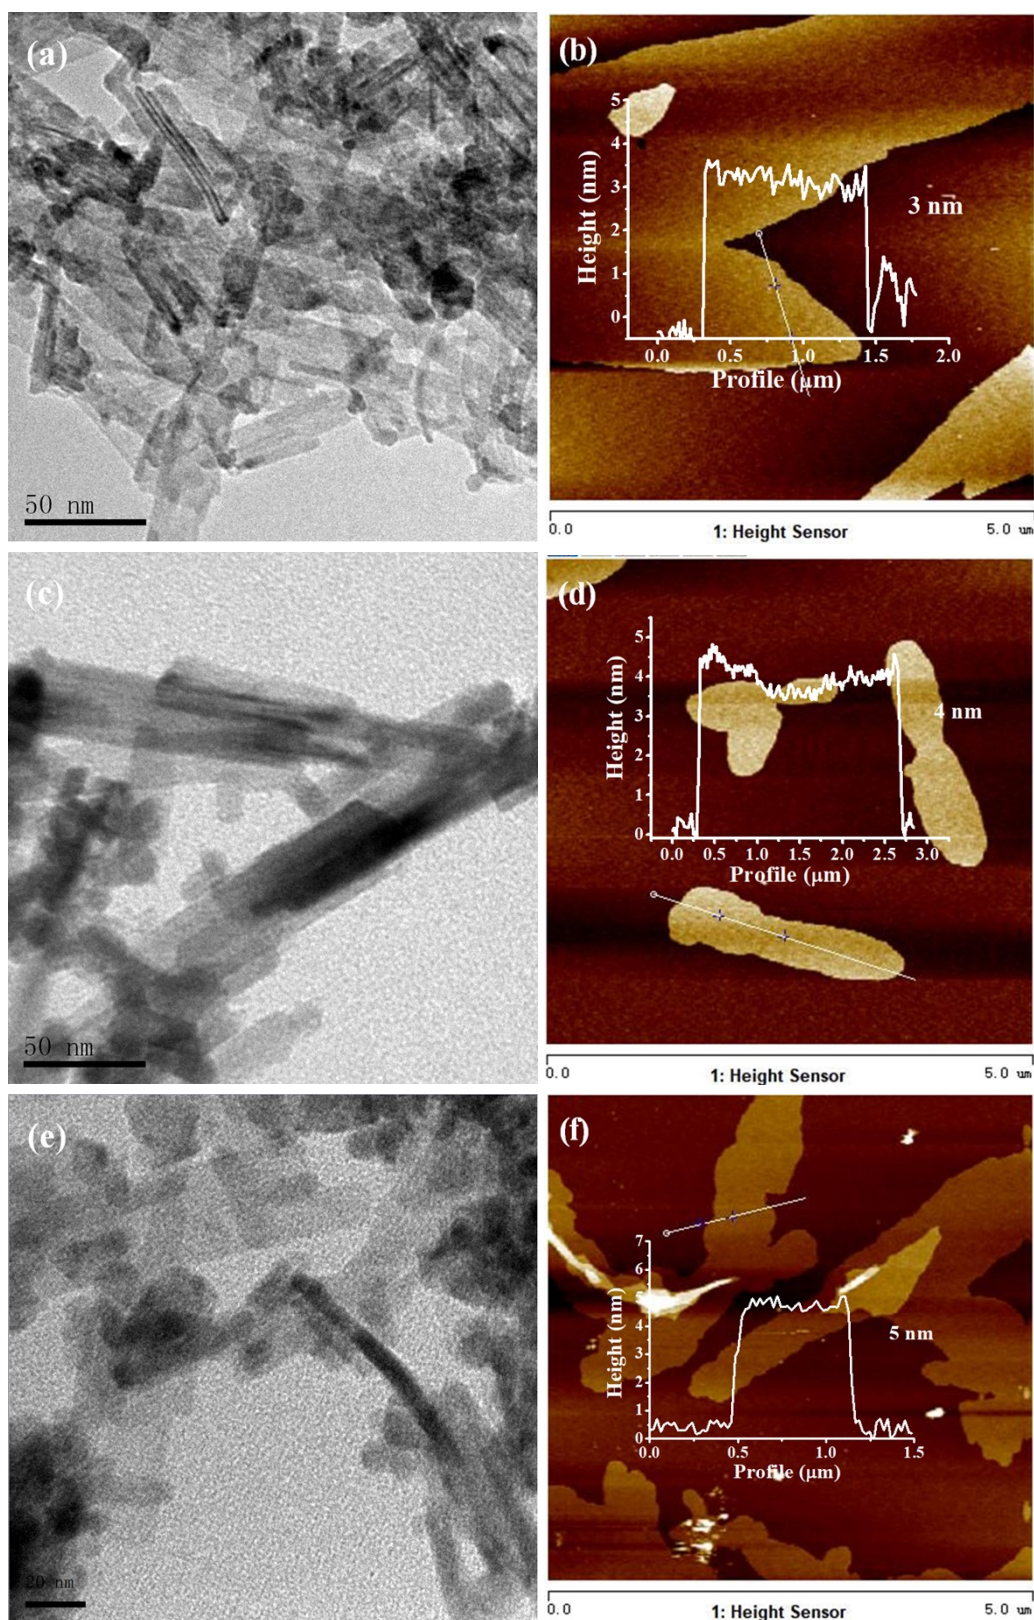

Figure S3. TEM and AFM images of the as-synthesized (a-b) CSNB-1, (c-d) CSNB-2 and (e-f) CSNB-3.

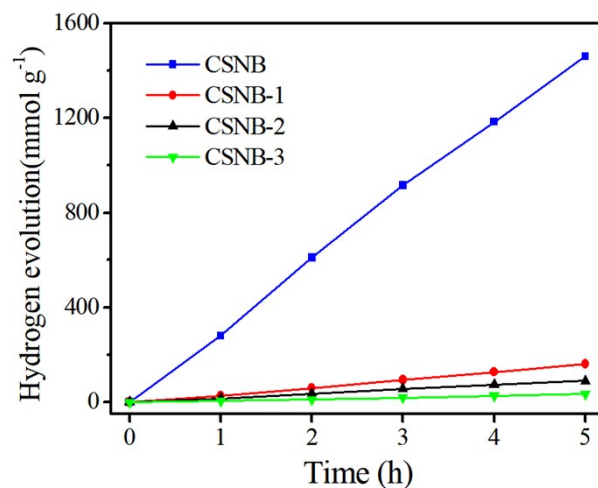

Figure S4. Time course for hydrogen evolution by the different thickness of CdS nanobelt samples under visible light irradiation.

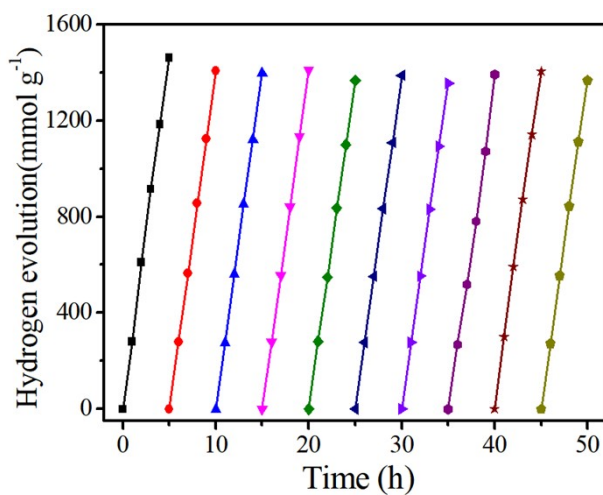

Figure S5. Recycle runs of hydrogen evolution over the CSNB under visible light illumination ( $\lambda > 400$  nm).

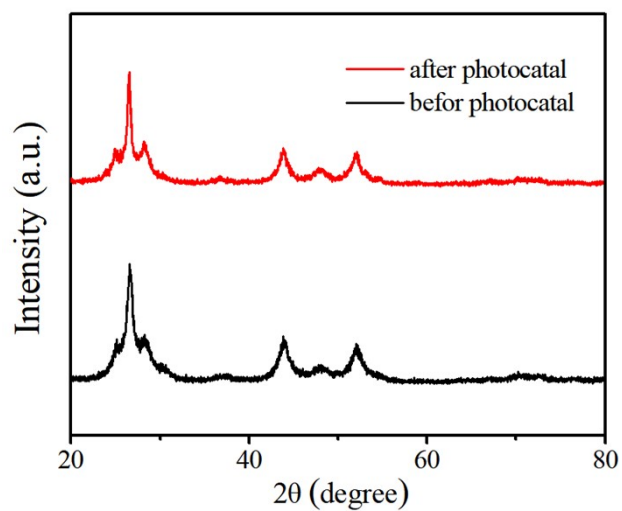

Figure S6. XRD patterns of CSNB before and after long-term photocatalytic reaction.

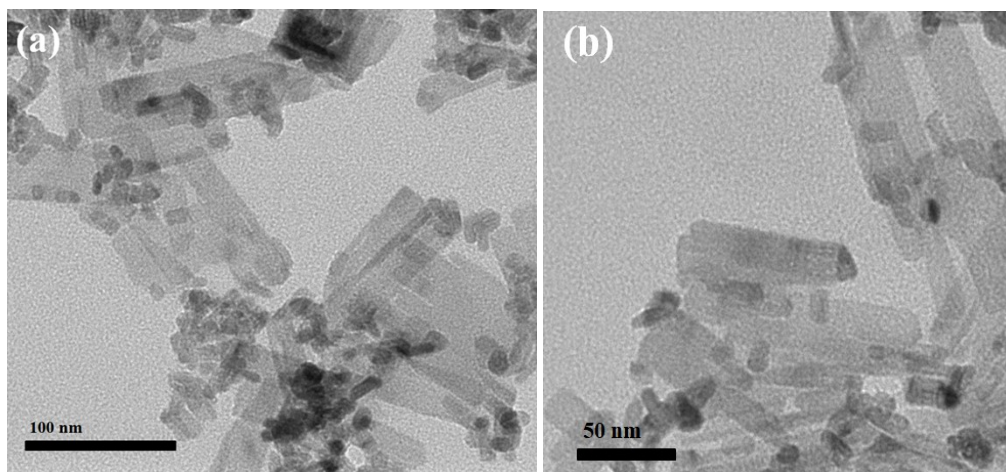

Figure S7. TEM images of the as-synthesized CSNB after long-term photocatalytic reaction.

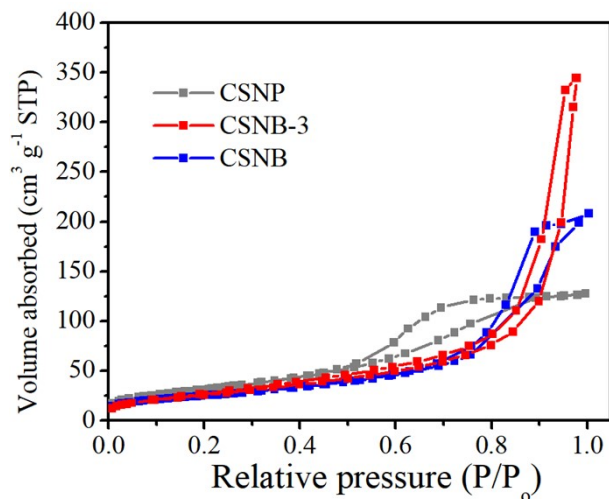

Figure S8. Nitrogen adsorption/desorption isotherm curves of the as-synthesized CSNP, CSNB-3 and CSNB.

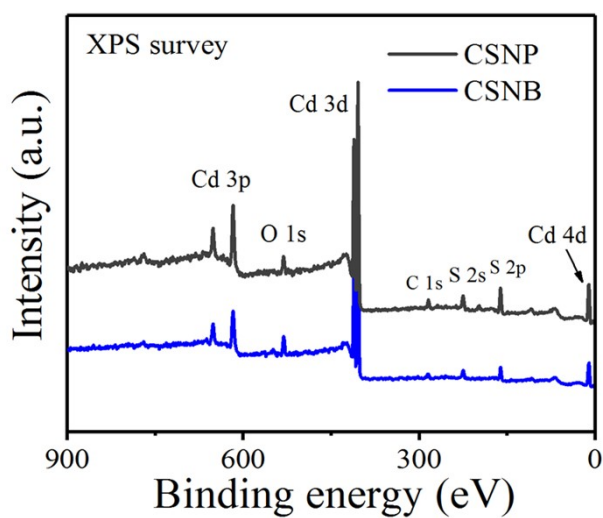

Figure S9. XPS survey spectra of the CSNP and CSNB.

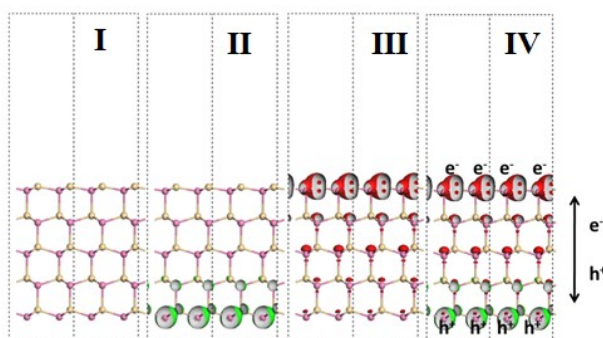

Figure S10. The distribution of electron clouds over the (001) surfaces hexagonal CdS (5 layers)

Table S1. Summary of CdS composites for photocatalytic H<sub>2</sub> production

| Photocatalyst | Cocatalyst        | Light source                      | Sacrificial reagent                               | H <sub>2</sub> evolution mmol·h <sup>-1</sup> ·g <sup>-1</sup> | Ref       |
|---------------|-------------------|-----------------------------------|---------------------------------------------------|----------------------------------------------------------------|-----------|
| CdS NBs       | No cocatalyst     | 300 W Xe lamp, $\lambda > 400$ nm | Na <sub>2</sub> S-Na <sub>2</sub> SO <sub>3</sub> | 282.12                                                         | This work |
| CdS NSs       | No cocatalyst     | 300 W Xe lamp, $\lambda > 420$ nm | Lactic acid                                       | 41.1                                                           | 1         |
| CdS NPs       | Pt                | 300 W Xe lamp, $\lambda > 420$ nm | (NH <sub>4</sub> ) <sub>2</sub> SO <sub>3</sub>   | 33                                                             | 2         |
| CdS NPs       | Pt-RGO            | 350 W Xe lamp, $\lambda > 420$ nm | Lactic acid                                       | 56                                                             | 3         |
| CdS NPs       | Pt-PdS            | 300 W Xe lamp, $\lambda > 420$ nm | Na <sub>2</sub> S-Na <sub>2</sub> SO <sub>3</sub> | 29.23                                                          | 4         |
| CdS NRs       | Pd-Pt             | 150 W Xe lamp                     | Lactic acid                                       | 130.33                                                         | 5         |
| CdS NRs       | MoS <sub>2</sub>  | 300 W Xe lamp, $\lambda > 420$ nm | Lactic acid                                       | 49.80                                                          | 6         |
| CdS NWs       | MoS <sub>2</sub>  | 300 W Xe lamp, $\lambda > 420$ nm | Lactic acid                                       | 95.70                                                          | 7         |
| CdS NRs       | MoS <sub>2</sub>  | 150 W Xe lamp                     | Lactic acid                                       | 238                                                            | 8         |
| CdS NRs       | Cu <sub>3</sub> P | 300 W Xe lamp, $\lambda > 420$ nm | Na <sub>2</sub> S-Na <sub>2</sub> SO <sub>3</sub> | 200                                                            | 9         |
| CdS NRs       | CoP               | 300 W Xe lamp, $\lambda > 420$ nm | Lactic acid                                       | 106                                                            | 10        |
| CdS NPs       | FeP               | LED: 30×3 W, $\lambda > 420$ nm   | Lactic acid                                       | 202                                                            | 11        |
| CdS NRs       | Co <sub>x</sub> P | 300 W Xe lamp, $\lambda > 420$ nm | Na <sub>2</sub> S-Na <sub>2</sub> SO <sub>3</sub> | 500                                                            | 12        |
| CdS NRs       | Ni <sub>2</sub> P | 300 W Xe lamp, $\lambda > 420$ nm | Na <sub>2</sub> S-Na <sub>2</sub> SO <sub>3</sub> | 1200                                                           | 13        |
| CdS NRs       | MoP               | 300 W Xe lamp, $\lambda > 420$ nm | Lactic acid                                       | 163.2                                                          | 14        |
| CdS NRs       | WS <sub>2</sub>   | 300 W Xe lamp, $\lambda > 420$ nm | Lactic acid                                       | 185.79                                                         | 15        |
| CdS NPs       | Ni-TNDs           | 300 W Xe lamp, $\lambda > 420$ nm | Ethanol                                           | 31.82                                                          | 16        |
| CdS NRs       | Co <sub>3</sub> N | 300 W Xe lamp, $\lambda > 420$ nm | Na <sub>2</sub> S-Na <sub>2</sub> SO <sub>3</sub> | 137.33                                                         | 17        |
| CdS NRs       | NiSe              | 300 W Xe lamp, $\lambda > 420$ nm | Na <sub>2</sub> S-Na <sub>2</sub> SO <sub>3</sub> | 170                                                            | 18        |

\*CdS NBs: CdS nanobelts; CdS NSs: CdS nanosheets; CdS NPs: CdS nanoparticles; CdS NRs: CdS nanorods; CdS NWs: CdS nanowires;

- 1 Y. Xu, W. W. Zhao, R. Xu, Y. Shi and B. Zhang, *Chem. Commun*, 2013, **49**, 9803-9805.
- 2 M. Luo, W. Yao, C. Huang, Q. Wu and Q. Xu, *J. Mater. Chem. A*, 2015, **3**, 13884-13891.
- 3 Q. Li, B. D. Guo, J. G. Yu, J. R. Ran, B. H. Zhang, H. J. Yan and J. R. Gong, *J. Am. Chem. Soc.*, 2011, **133**, 10878-10884.
- 4 H. J. Yan, J. H. Yang, G. J. Ma, G. P. Wu, X. Zong, Z. B. Lei, J. Y. Shi and C. Li, *J. Catal*, 2009, **266**, 165-168.
- 5 H. Park, D. A. Reddy, Y. Kim, S. Lee, R. Ma and T. K. Kim, *Chem. Eur. J*, 2017, **23**, 13112-13119.
- 6 X. L. Yin, L. L. Li, W. J. Jiang, Y. Zhang, X. Zhang, L. J. Wan and J. S. Hu, *ACS. Appl. Mater. Interfaces*, 2016, **8**, 15258-15266.
- 7 J. He, L. Chen, F. Wang, Y. Liu, P. Chen, C. T. Au and S. F. Yin, *Chem. Sus. Chem*, 2016, **9**, 624- 630.
- 8 D. A. Reddy, H. Park, S. Hong, D. P. Kumara and T. K. Kim, *J. Mater. Chem. A*, 2017, **5**, 6981-6991.
- 9 Z. J. Sun, D. Q. Yue, J. S. Li, J. Xu, H. F. Zheng and P. W. Du, *J. Mater. Chem. A*, 2015, **3**, 10243-10247.
- 10 D. Zhao, B. Sun, X. Q. Li, L. X. Qin, S. Z. Kang and D. Wang, *RSC. Adv*, 2016, **6**, 33120-33125.
- 11 H. Q. Cheng, X. J. Lv, S. Cao, Z. Y. Zhao, Y. Chen and W. F. Fu, *Sci. Rep.*, 2016, **6**, 19846.
- 12 Y. M. Dong, L. G. Kong, G. L. Wang, P. P. Jiang, N. Zhao and H. Z. Zhang, *Appl. Catal. B: Environ*, 2017, **211**, 245-251.
- 13 Z. J. Sun, H. F. Zheng, J. S. Li and P. W. Du, *Energy. Environ. Sci*, 2015, **8**, 2668-2676.
- 14 Q. D. Yue, Y. Y. Wan, Z. J. Sun, X. J. Wu, Y. P. Yuan and P. W. Du, *J. Mater. Chem. A*, 2015, **3**, 16941-16947.
- 15 M. Gopannagari, D. P. Kumar, D. A. Reddy, S. Hong, M. I. Song and T. K. Kim, *J. Catal*, 2017, **351**, 153-160.
- 16 C. T. Dinh, M. H. Pham, F. Kleitz and T. O. Do, *J. Mater. Chem. A*, 2013, **1**, 13308-13313.
- 17 H. L. Chen, D. C. Jiang, Z. J. Sun, R. M. Irfan, L. Zhang and P. W. Du, *Catal. Sci. Technol*, 2017, **7**, 1515-1522.
- 18 Z. Sun, H. Chen, L. Zhang, D. Lu, P. Du, *J. Mater. Chem. A*, 2016, **4**, 13289-13295.



Table S2. The lifetime datas of the as-synthesized CdS samples.

| Samples | $\tau_1$ (ns) | $\tau_2$ (ns) | $\tau_3$ (ns) | $\tau_{av}$ (ns) |
|---------|---------------|---------------|---------------|------------------|
| CSNP    | 0.2938        | 1.39          | 5.4           | 1.71             |
| CSNB-3  | 0.3483        | 1.48          | 7.2           | 2.63             |
| CSNB    | 0.7965        | 3.65          | 9.75          | 6.3              |
